# Supplementary material for: Bispecific antibodies enhance tumor‐infiltrating T cell cytotoxicity against autologous HER‐2‐expressing high‐grade ovarian tumors
Source: PubMed Central journal article supplement (PMC7318294; doi:10.1002/jlb.5ma1119-265r), 2019-12-13
Supplement: JLB-107-1081-s001.pdf [file JLB-107-1081-s001.pdf]

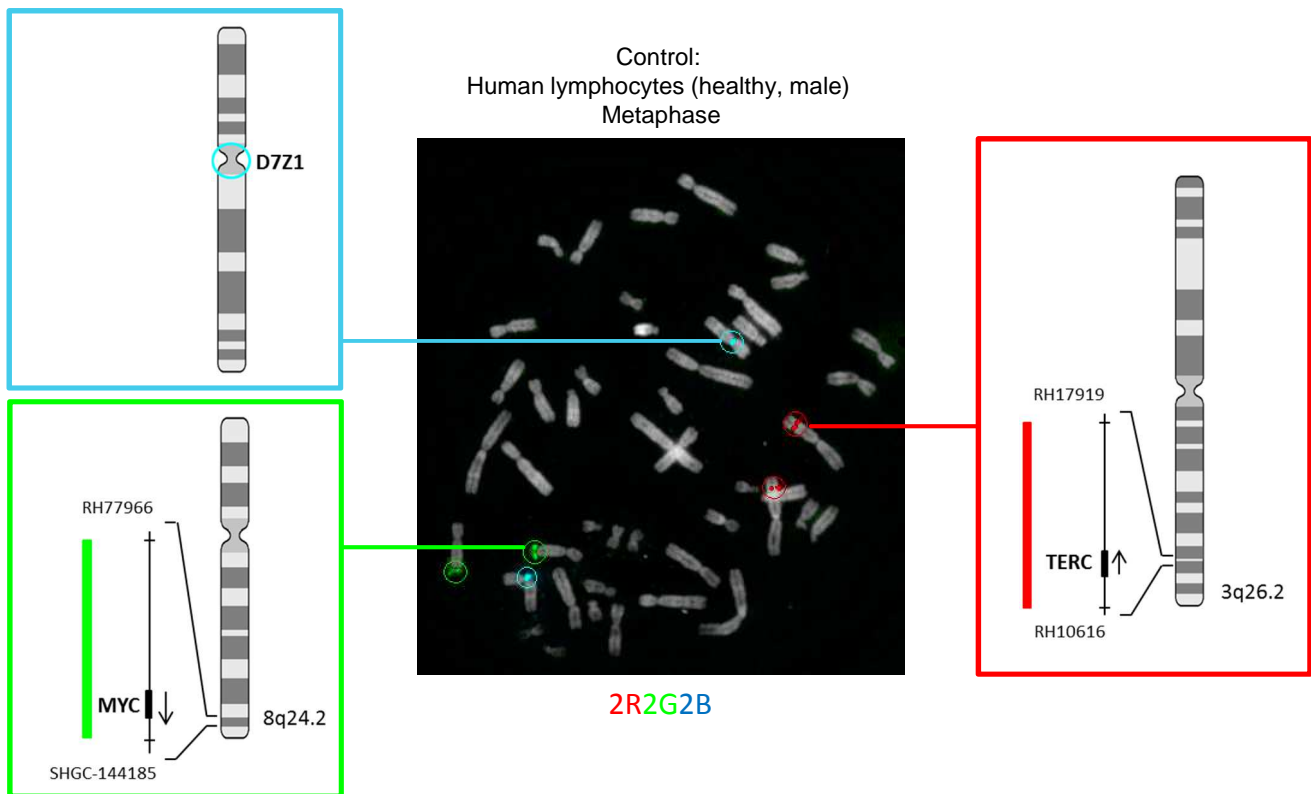

**Supplemental Figure 1: Scheme of Kreatech/Leica tricolor probe KBI-10704.** Diagrams of normal chromosomes three, eight and seven along with the fluorescence labeled region in our utilized FISH probe. Middle: Exemplary metaphase nucleus of a healthy lymphocyte. There are two distinct signals for each color discernible. Adapted from Leica Biosystems product catalog. ([https://www.leicabiosystems.com/fileadmin/biosystems/PDF/95.14492\\_LBS\\_AS\\_Product\\_Catalog\\_2017\\_LR.pdf](https://www.leicabiosystems.com/fileadmin/biosystems/PDF/95.14492_LBS_AS_Product_Catalog_2017_LR.pdf))
